# Supplementary material
Source: publisher figshare collection journal article supplement (https://frontiersin.figshare.com/ndownloader/files/27921558)
Supplement: Supplementary file 1 [file 27921558]

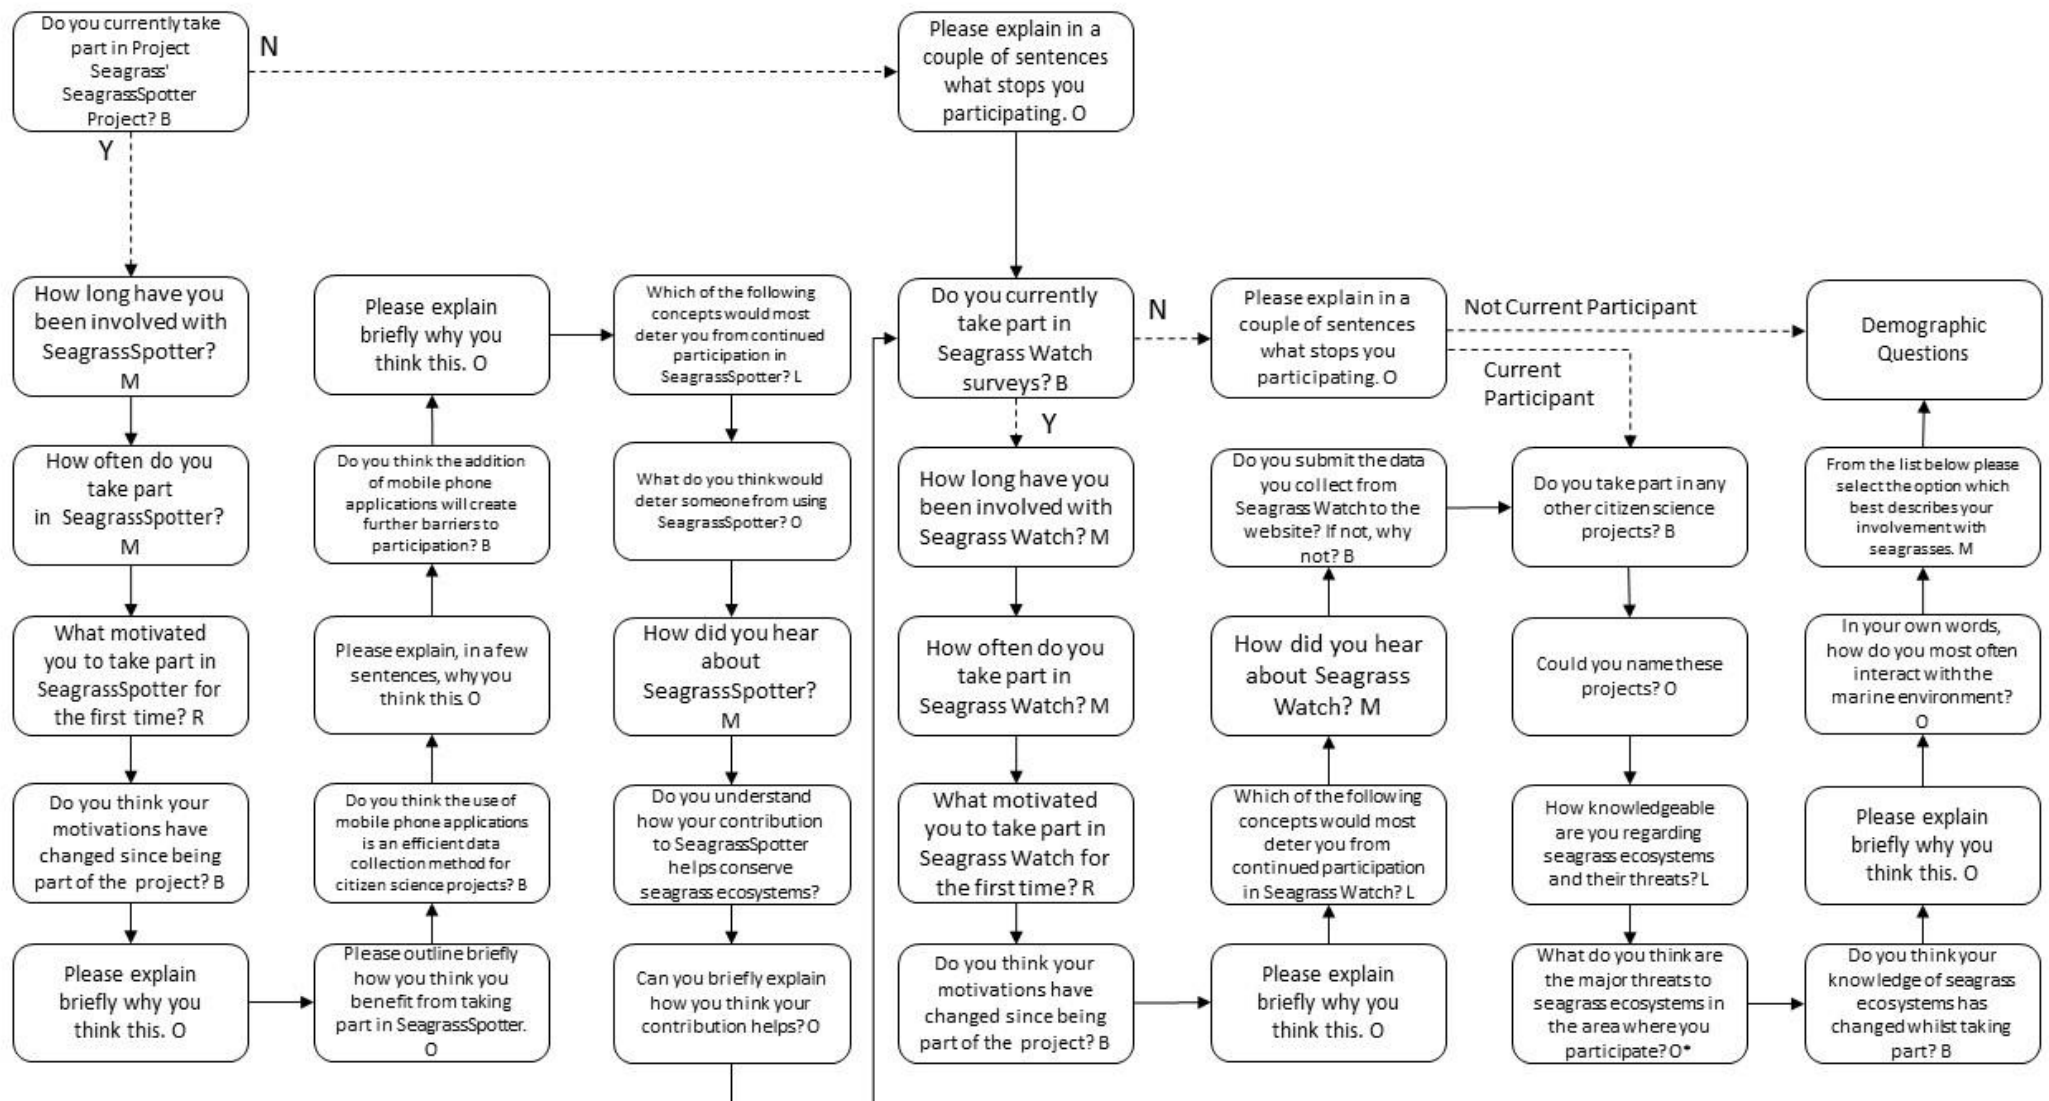

**Supp 1.** Conceptual framework of questionnaire showing primary flows (solid arrows) and points of flow change based on response (dashed arrows). Type of question indicated by letter where O = open question, R = ranking exercise based on literature, L = likert-type scale, B = binary response (Yes or No), M = multiple choice. \* Indicates the question displayed was shortened from that used in the questionnaire.
